# Supplementary material for: Interspecific Sex in Grass Smuts and the Genetic Diversity of Their Pheromone-Receptor System
Source: PLOS journal article supplement (doi:10.1371/journal.pgen.1002436), 2011-12-29
Supplement: S9 (10.1371/journal.pgen.1002436.s009) [file journal.pgen.1002436.s009]

**Table S2: Strain selection**

| Strain | Species                              | Sex     | Genotype       | Host                           | Origin           | Reference                    |
|--------|--------------------------------------|---------|----------------|--------------------------------|------------------|------------------------------|
| RK 028 | <i>Macalpinomyces eriachnes</i>      | n.a.    | wt             | <i>Eriachne sulcate</i>        | Australia        | this work                    |
| UMa704 | <i>Melanopsichium pennsylvanicum</i> | n.a.    | wt             | <i>Persicaria lapathifolia</i> | Germany          | Marco Thines                 |
| RK 023 | <i>Sporisorium anthracoidesporum</i> | n.a.    | wt             | <i>Pseudoraphis spinescens</i> | Papua New Guinea | this work                    |
| RK 079 | <i>S. bursum</i>                     | n.a.    | wt             | <i>Themeda quadrivalis</i>     | India            | this work                    |
| RK 133 | <i>S. consanguineum</i>              | n.a.    | wt             | <i>Aristida uruguayensis</i>   | Argentina        | this work                    |
| RK 033 | <i>S. exsertum</i>                   | n.a.    | wt             | <i>Themeda triandra</i>        | Australia        | this work                    |
| RK 081 | <i>S. mishrae</i>                    | n.a.    | wt             | <i>Apluda mutica</i>           | India            | this work                    |
| UMa695 | <i>S. reilianum</i>                  | a1b1    | wt             | <i>Zea mays</i>                | Germany          | Jan Schirawski               |
| UMa694 | <i>S. reilianum</i>                  | a2b2    | wt             | <i>Zea mays</i>                | Germany          | Jan Schirawski               |
| UMa696 | <i>S. reilianum</i>                  | a3b2    | wt             | <i>Zea mays</i>                | China            | Jan Schirawski               |
| UMa698 | <i>S. scitamineum</i>                | MAT1    | wt             | <i>Saccharum sp.</i>           | South Africa     | Jan Schirawski               |
| UMa697 | <i>S. scitamineum</i>                | MAT2    | wt             | <i>Saccharum sp.</i>           | South Africa     | Jan Schirawski               |
| RK 031 | <i>S. walkeri</i>                    | a1b?    | wt             | <i>Themeda triandra</i>        | Australia        | this work                    |
| UMa693 | <i>S. walkeri</i>                    | a3b?    | wt             | <i>Themeda triandra</i>        | Australia        | this work                    |
| RK 074 | <i>Tranzscheliella hypodytes</i>     | n.a.    | wt             | n.a.                           | n.a.             | this work                    |
| RK 011 | <i>Ustilago avenae</i>               | diploid | wt             | <i>Arrhenatherum elatius</i>   | Germany          | this work                    |
| UMa709 | <i>U. cynodontis</i>                 | a1b?    | wt             | <i>Cynodon dactylon</i>        | Spain            | this work                    |
| UMa710 | <i>U. cynodontis</i>                 | a3b?    | wt             | <i>Cynodon dactylon</i>        | Spain            | this work                    |
| UMa701 | <i>U. filiformis</i>                 | a1b?    | wt             | <i>Glyceria fluitans</i>       | Germany          | this work                    |
| UMa700 | <i>U. hordei</i>                     | MAT1    | wt             | <i>Hordeum vulgare</i>         | USA              | Jan Schirawski               |
| UMa699 | <i>U. hordei</i>                     | MAT2    | wt             | <i>Hordeum vulgare</i>         | USA              | Jan Schirawski               |
| RK 058 | <i>U. kollerii</i>                   | n.a.    | wt             | <i>Avena sativa</i>            | n.a.             | this work                    |
| FB1    | <i>U. maydis</i>                     | a1b1    | wt             | <i>Zea mays</i>                | USA              | Banuett and Herskowitz, 1989 |
| FB2    | <i>U. maydis</i>                     | a2b2    | wt             | <i>Zea mays</i>                | USA              | Banuett and Herskowitz, 1989 |
| UMa09  | <i>U. maydis</i>                     | a1b1    | Pmfa1-egfp-cbx | <i>Zea mays</i>                | USA              | Kaffarnik et al., 2003       |
| UMa10  | <i>U. maydis</i>                     | a2b2    | Pmfa1-egfp-cbx | <i>Zea mays</i>                | USA              | this work                    |
| FB6b   | <i>U. maydis</i>                     | a1b2    | wt             | <i>Zea mays</i>                | USA              | Banuett and Herskowitz, 1989 |
| FB6a   | <i>U. maydis</i>                     | a2b1    | wt             | <i>Zea mays</i>                | USA              | Banuett and Herskowitz, 1989 |
| RK 032 | <i>U. sparsa</i>                     | n.a.    | wt             | n.a.                           | India            | this work                    |
| RK 089 | <i>U. trichophora</i>                | n.a.    | wt             | <i>Echinochloa colona</i>      | India            | this work                    |
| RK 075 | <i>U. vetiveriae</i>                 | n.a.    | wt             | <i>Vetiveria zizanioides</i>   | India            | this work                    |
| RK 254 | <i>U. williamsii</i>                 | diploid | wt             | n.a.                           | USA              | this work                    |
| UMa702 | <i>U. xerochloae</i>                 | a1b?    | wt             | <i>Xerochloae imberbis</i>     | Australia        | this work                    |
| UMa703 | <i>U. xerochloae</i>                 | a3b?    | wt             | <i>Xerochloae imberbis</i>     | Australia        | this work                    |
| UMa706 | <i>Ustanciosporium gigantosporum</i> | a1b?    | wt             | <i>Rhynchospora alba</i>       | Germany          | this work                    |
| UMa708 | <i>Us. gigantosporum</i>             | a2b?    | wt             | <i>Rhynchospora alba</i>       | Germany          | this work                    |
| UMa707 | <i>Us. gigantosporum</i>             | a3b?    | wt             | <i>Rhynchospora alba</i>       | Germany          | this work                    |
| RK 087 | <i>Us. standleyanum</i>              | n.a.    | wt             | <i>Rhynchospora rugosa</i>     | Ecuador          | this work                    |
